# Supplementary material for: Enhanced debromination of tetrabromobisphoenol a by zero-valent copper-nanoparticle-modified green rusts
Source: Royal Society of Chemistry journal article supplement (doi:10.1039/c8en01289j), 2019-01-01
Supplement: c8en01289j1.pdf [file c8en01289j1.pdf]

Supplementary Information for  
**Enhanced Debromination of Tetrabromobisphenol A by  
Zero-valent Copper Nanoparticles Modified Green Rusts**

Liping Fang<sup>a</sup>, Ru Liu<sup>b</sup>, Ling Xu<sup>b</sup>, Ji Li<sup>b</sup>, Li-Zhi Huang<sup>c,\*</sup>, Fangbai Li<sup>a</sup>

<sup>a</sup> *Guangdong Key Laboratory of Integrated Agro-environmental Pollution Control and  
Management, Guangdong Institute of Eco-Environmental Science & Technology, No. 808,  
Tianyuan Road, Guangzhou 510650, China.*

<sup>b</sup> *Faculty of Material Science and Chemistry, China University of Geosciences, No. 388, Lumo  
Road, Wuhan 430074, China*

<sup>c</sup> *School of Civil Engineering, Wuhan University, No. 8, East Lake South Road, Wuhan, P.R.  
China*

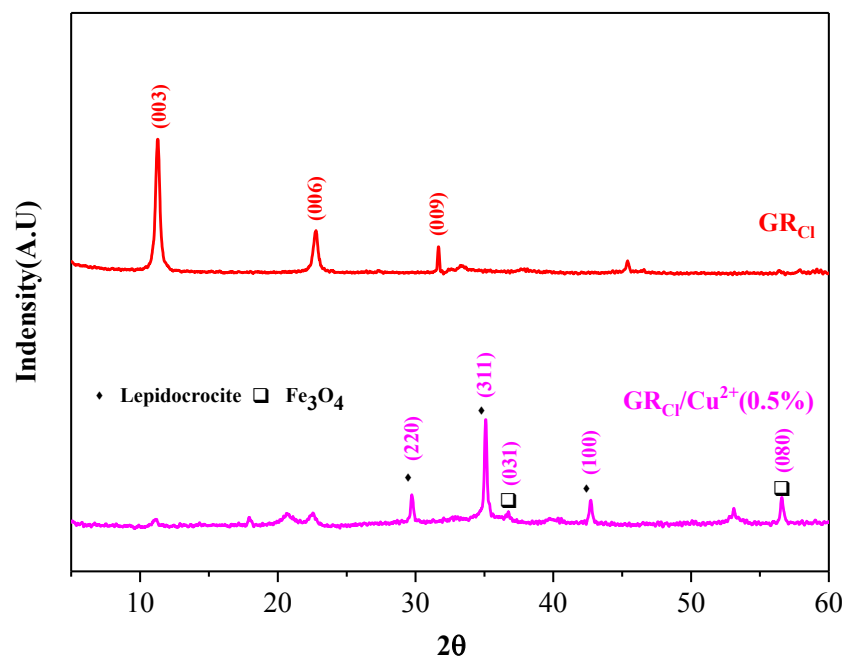

Figure S1. XRD of the GR(Cl)-Cu<sup>2+</sup> and GR(Cl).

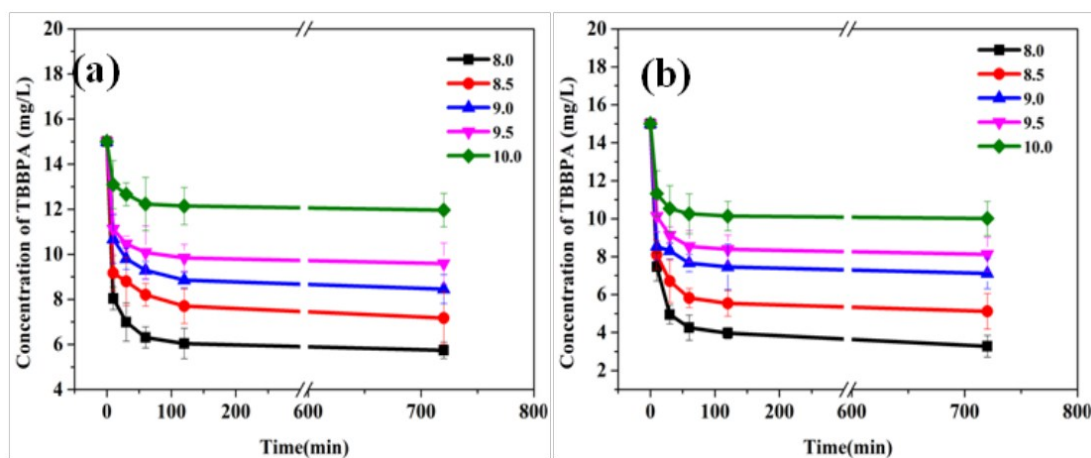

Figure S2. Effect of pH on TBBPA reduction by GR(Cl) and GR(Cl)-Cu NPs.

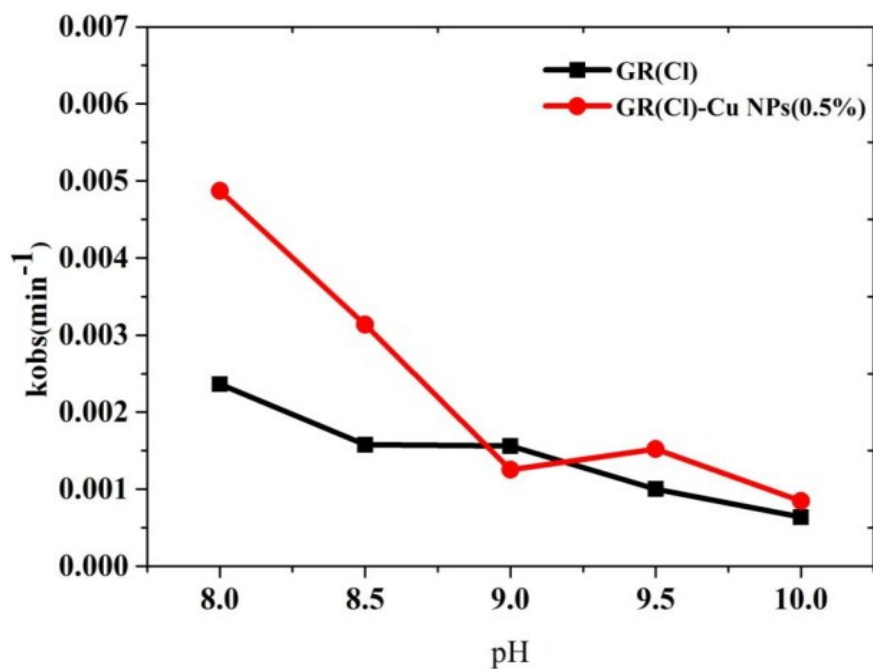

Figure S3. Effect of pH on pseudo first order reaction rate of TBBPA reduction by GR(Cl) and GR(Cl)-Cu NPs.

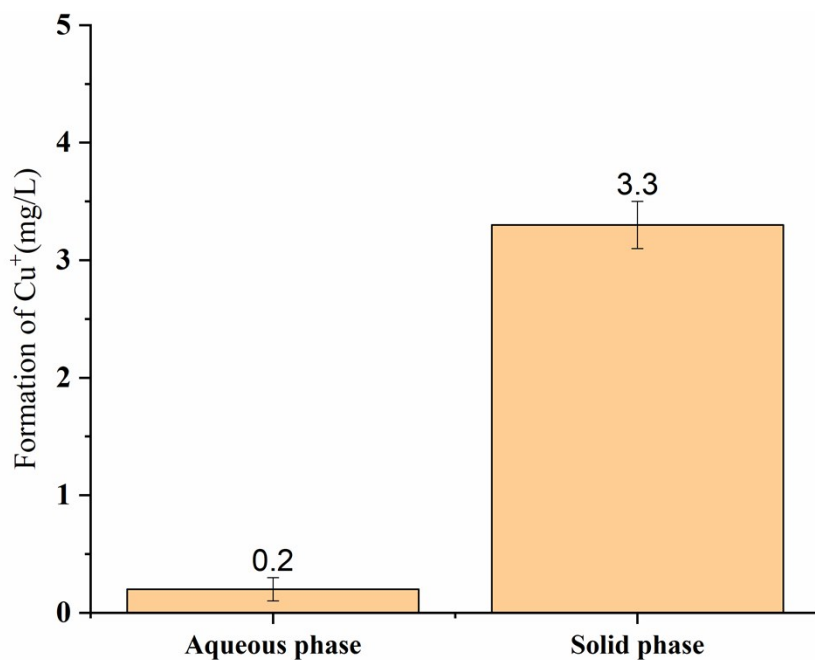

Figure S4.  $\text{Cu}^+$  content in GR(Cl)- $\text{Cu}^{2+}$  system (0.5%). The concentration is normalized to the reaction aqueous volume.

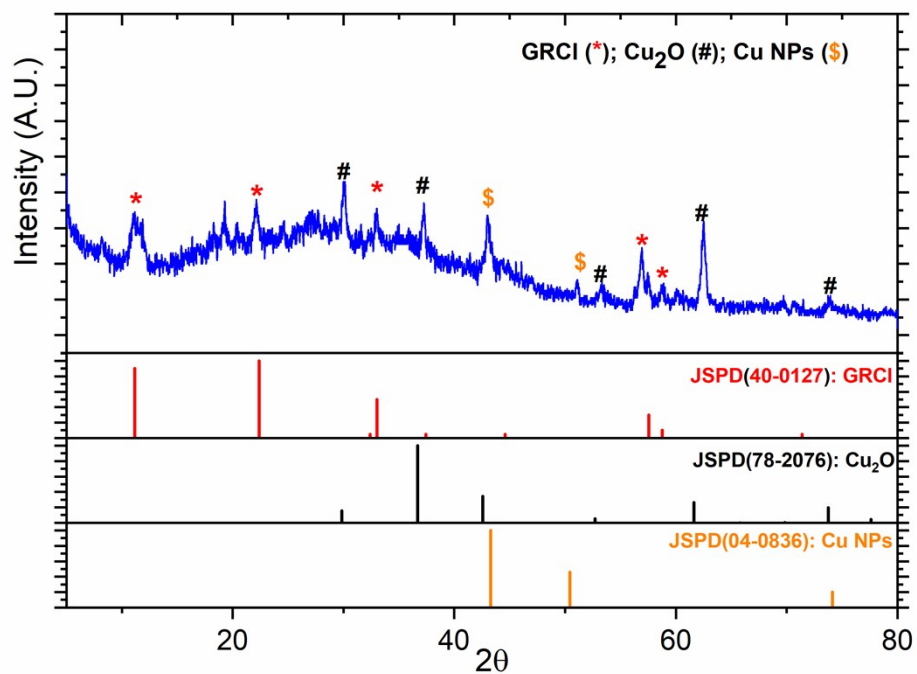

Figure S5. Cu<sub>2</sub>O generation after GR(Cl)-Cu NPs reaction with TBBPA. High Cu NPs dosage (10%) in GR(Cl)-Cu NPs was used for Cu<sub>2</sub>O measurement.

tbppa full scan-1-1-NEG-2 #62 RT: 0.53 AV: 1 NL: 7.36E3  
T: -c ESI Q1MS [530.000-600.000]

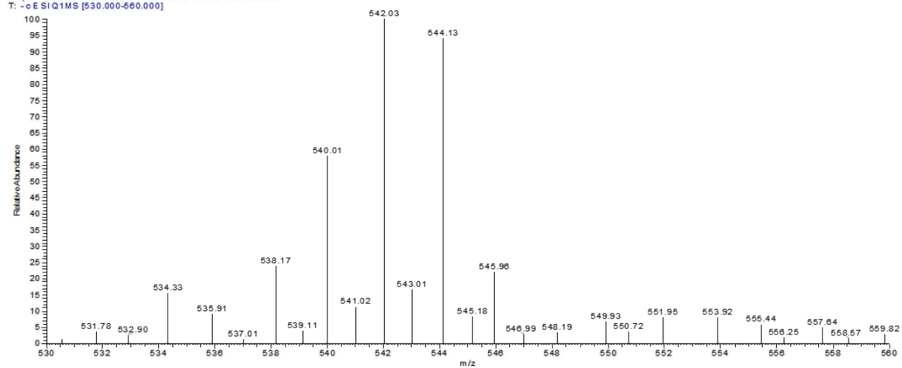

TBBPA

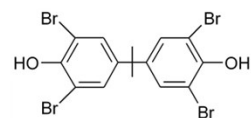

tbppa q1ms full scan-4-1-NEG-1 #21 RT: 0.17 AV: 1 NL: 4.05E3  
T: -c ESI Q1MS [460.000-470.000]

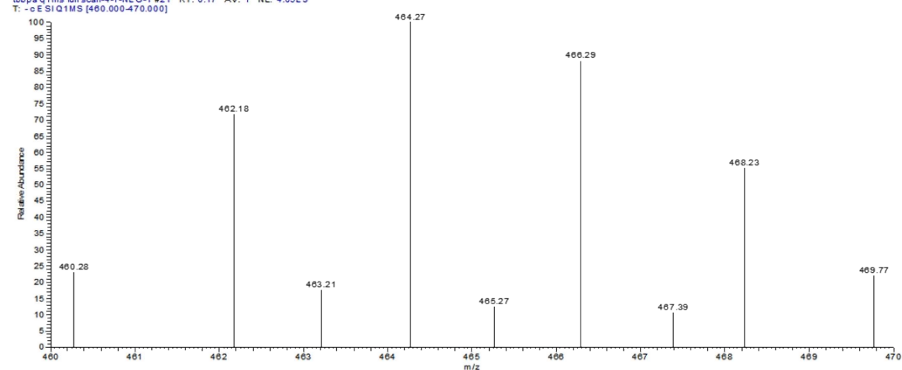

Tri-BBPA

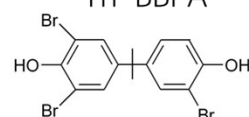

tbppa q1ms full scan-6-1-NEG-0 #84 RT: 0.72 AV: 1 NL: 1.37E3  
T: -c ESI Q1MS [411.000-420.000]

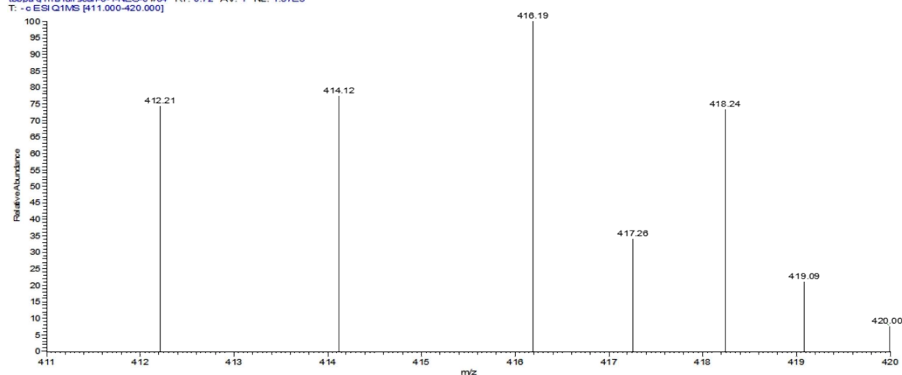

DBBPA

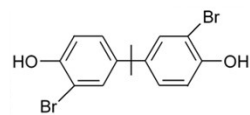

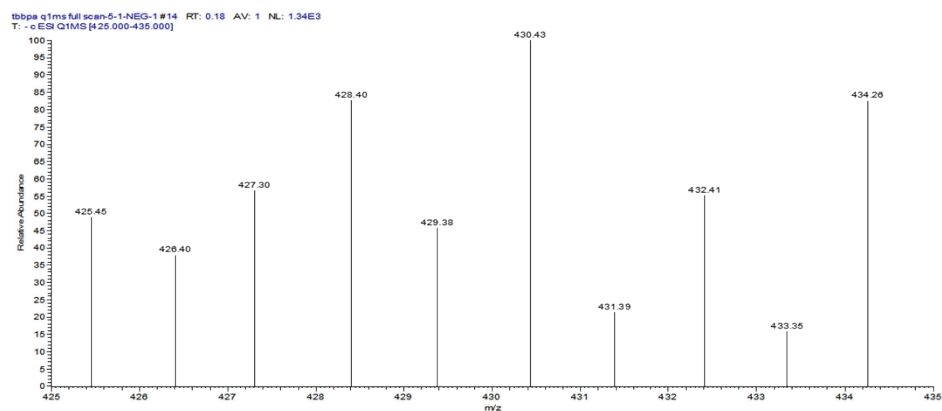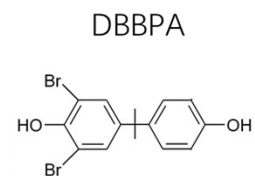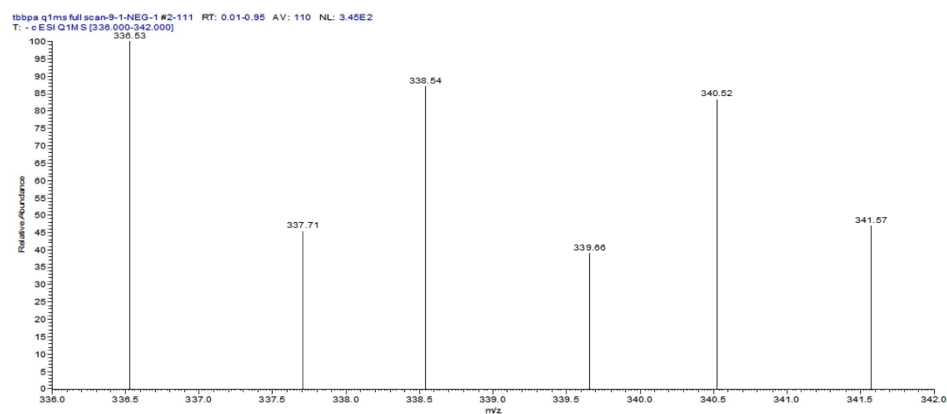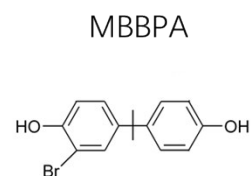

Figure S6. Mass spectra of potential intermediates from the degradation of TBBPA by GR(Cl)-Cu NPs.
